# Supplementary material for: Unconventional isoquinoline-based SERMs elicit fulvestrant-like transcriptional programs in ER+ breast cancer cells
Source: Springer Nature journal article supplement (doi:10.1038/s41523-022-00497-9), 2022-12-14
Supplement: MOESM1 [file 41523_2022_497_MOESM1_ESM.pdf]

## SUPPLEMENTARY FIGURES

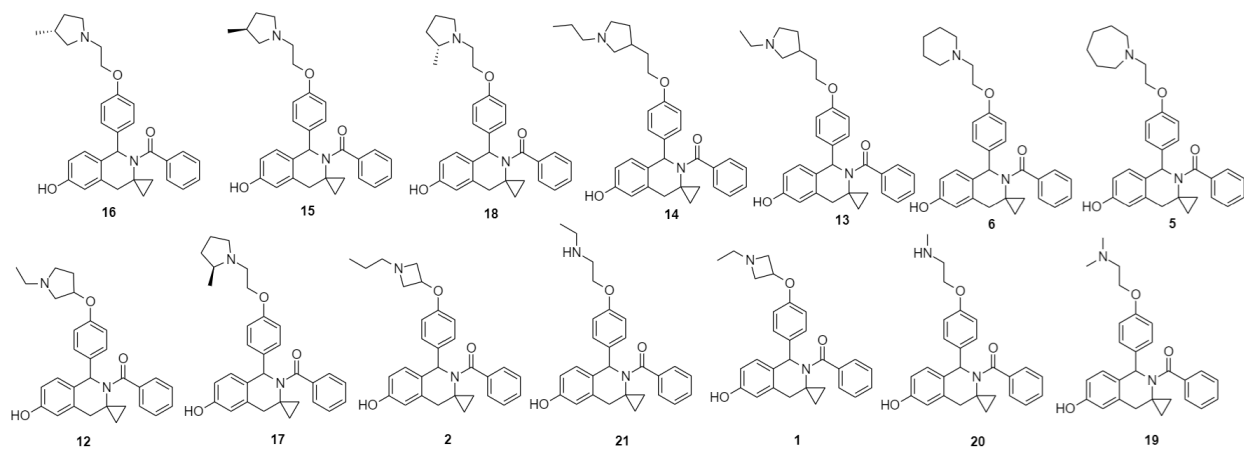

**Supplementary Figure 1:** Chemical structures of the first 14 T6I derivatives.

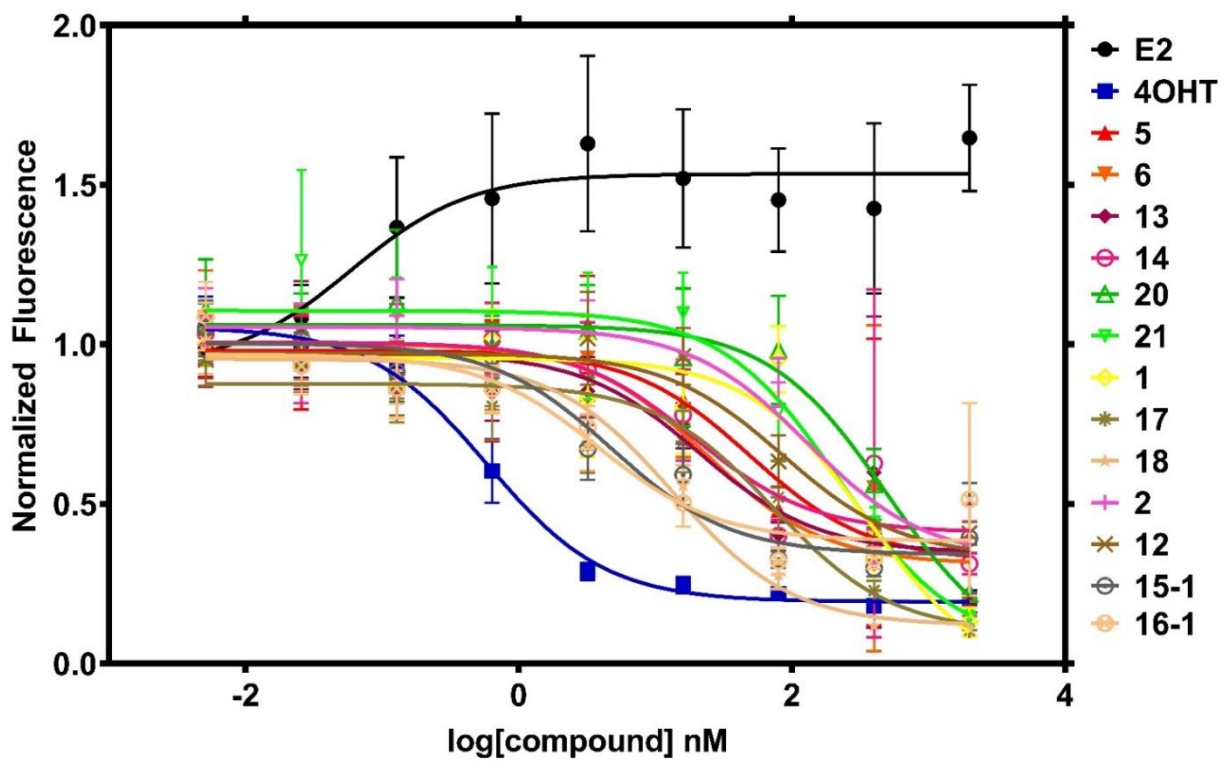

**Supplementary Figure 2:** Estrogen response element reporter gene expression in the presence of 1 nM E2. X-1 indicates molecules that have been chirally purified and the first peak tested. Second peak was inactive. Data shown are the mean of three replicates  $\pm$  std. dev..

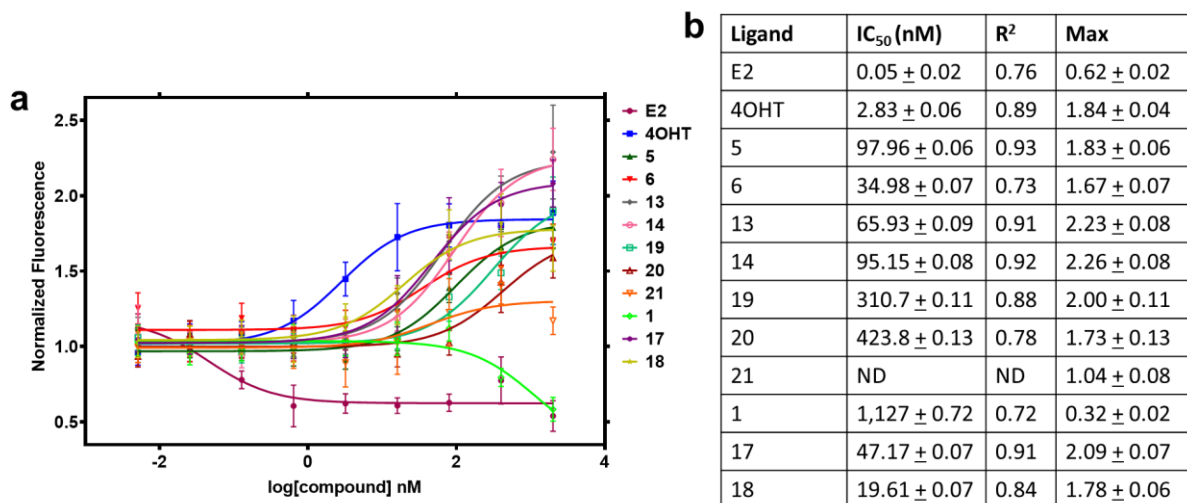

**Supplementary Figure 3:** Influence of representative T6Is on halo-ER $\alpha$  in T47D breast cancer cells. A) Dose response curves for halo-ER $\alpha$  accumulation after 24 hours treatment with E2, 4OHT, and representative T6I. B) IC<sub>50</sub>, Goodness of Fit (R<sup>2</sup>), and normalized signal at maximum dose (1  $\mu$ M). All data are the mean of three treatments  $\pm$  std. dev. and are normalized to cell count in their respective wells.

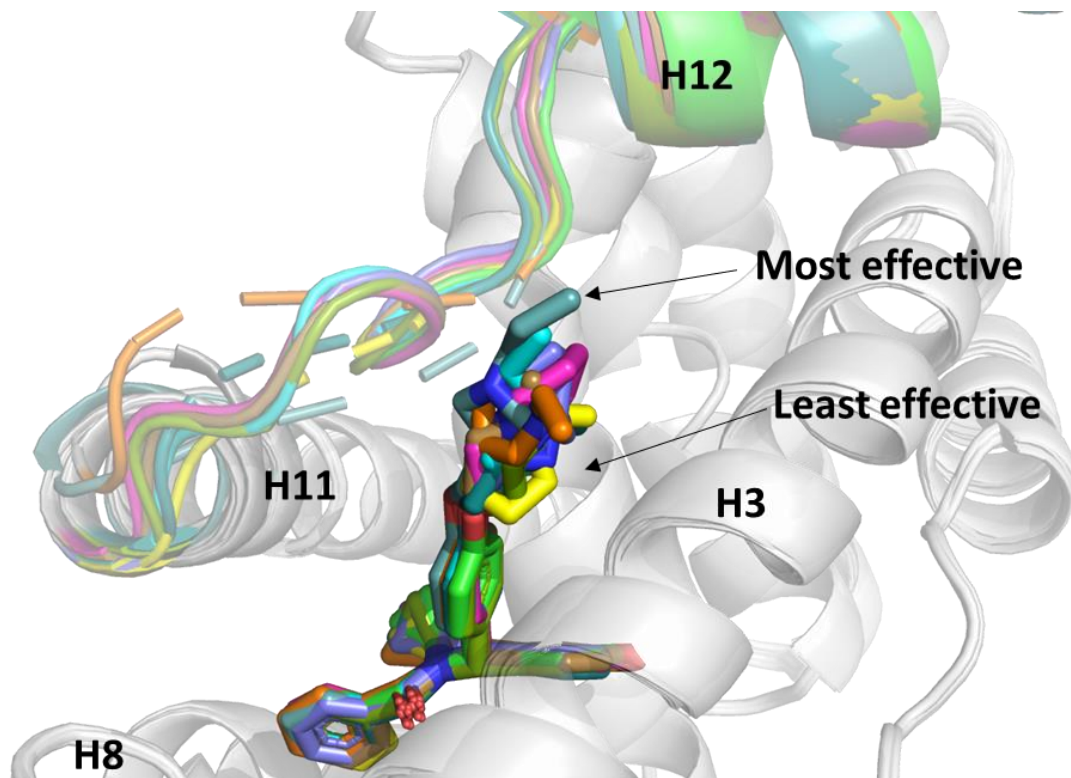

**Supplementary Figure 4:** Superposition of first 10 x-ray co-crystal structures of T6I SERMs in complex with ER $\alpha$  LBD highlighting the relationship between side-arm position relative to H12 and anti-transcriptional potency.

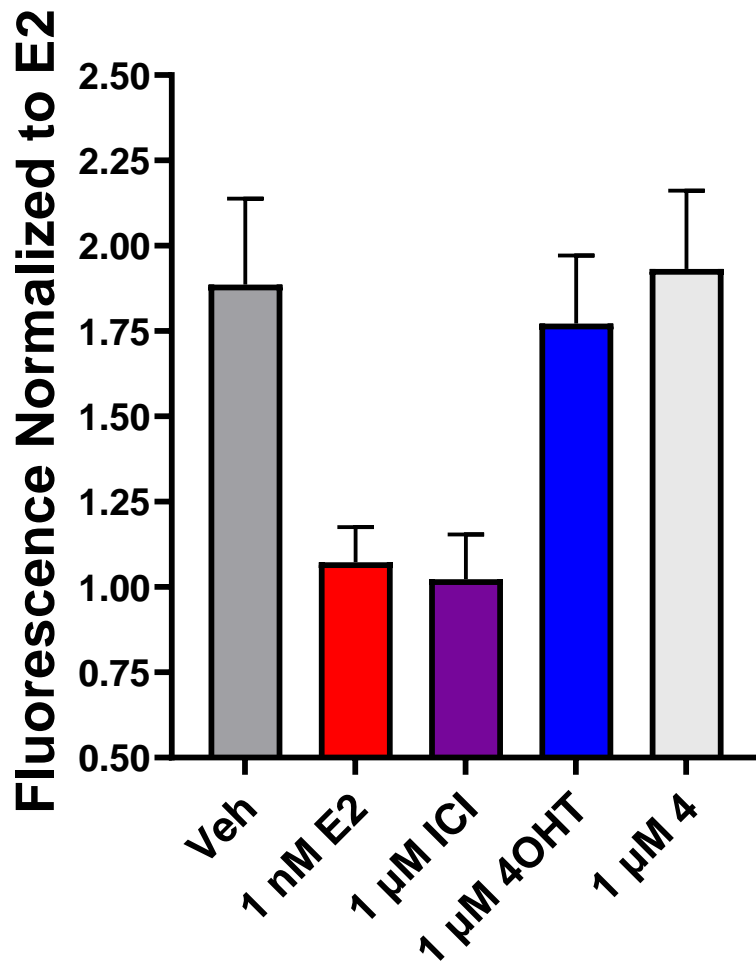

**Supplementary Figure 5:** In-cell western analysis of T6I-4 compared to E2, ICI, and 4OHT in T47D breast cancer cells. Data are the mean of three replicates  $\pm$  std. dev.

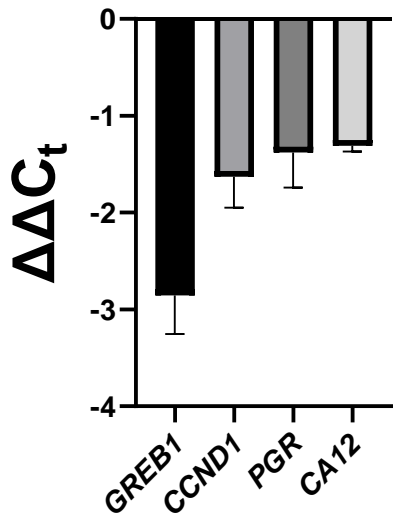

**Supplementary Figure 6:** Induction of ER $\alpha$  target gene expression.  $\Delta\Delta C_t = \Delta C_t(E2) - \Delta C_t(veh)$ .

Data are the mean of three replicates  $\pm$  std. dev..

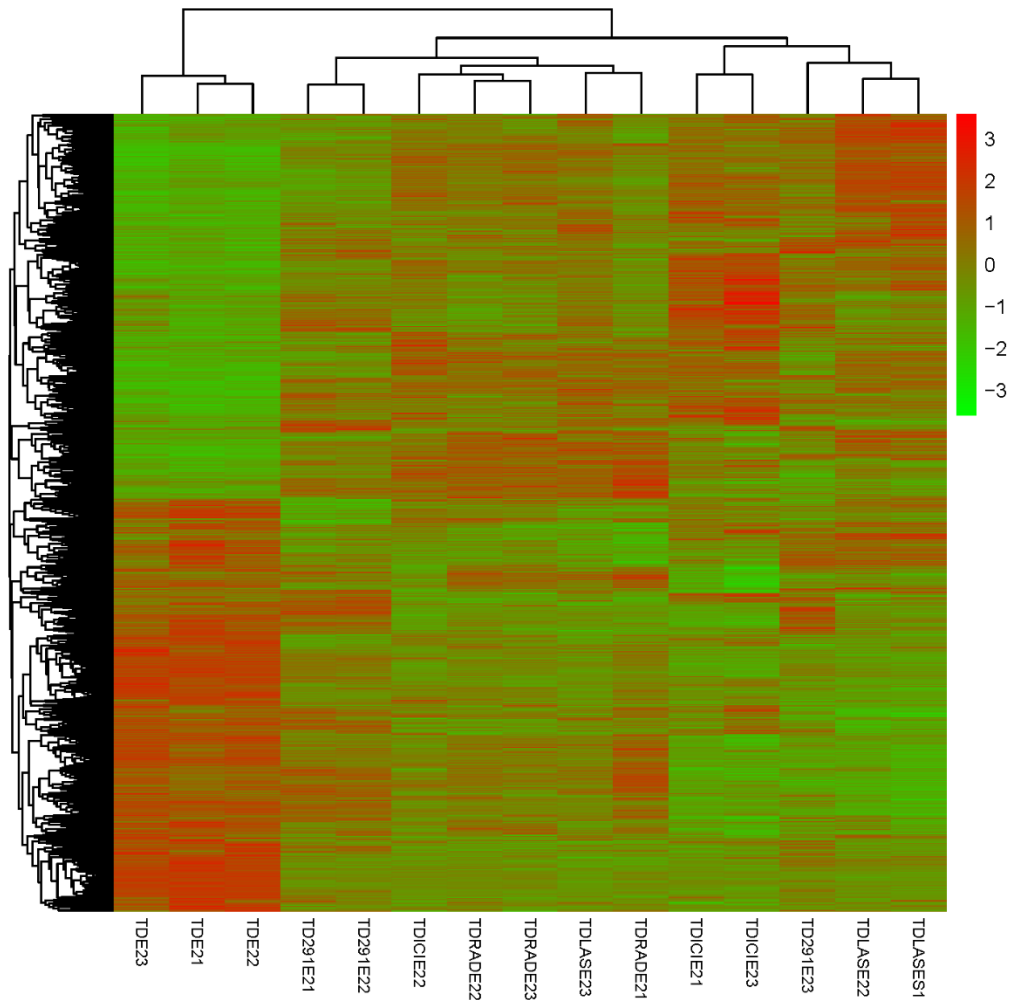

**Supplementary Figure 7:** Heatmap of differentially expressed genes in T47D cells treated with vehicle, 1 nM E2, or 29P1A, laso, RAD, ICI in the presence of 1 nM E2. TDE2 are replicates of T47D cells treated with E2. TD-291E2 are replicates of T47D cells treated with E2 and T6I-29-1A. TDLASE2 are replicates of T47Ds treated with E2 and laso. TDICIE2 are replicates of T47Ds treated with E2 and ICI. TDRADE2 are replicates of T47Ds treated with RAD1901 and E2.

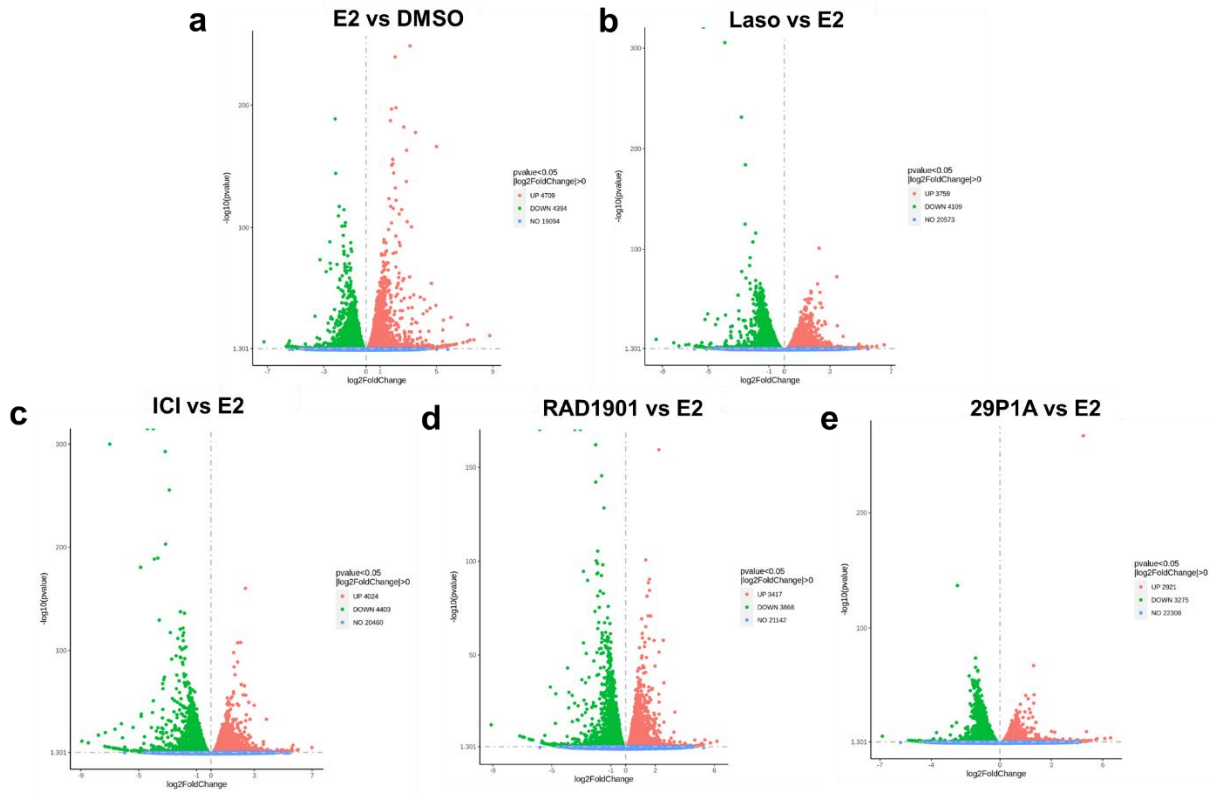

**Supplementary Figure 8:** Volcano plots of differentially expressed genes between A) E2 and vehicle (DMSO), B) Laso, C) ICI, and D) 29P1A. All antagonists are in the presence of 1 nM E2 and compared to 1 nM E2-only treatment.

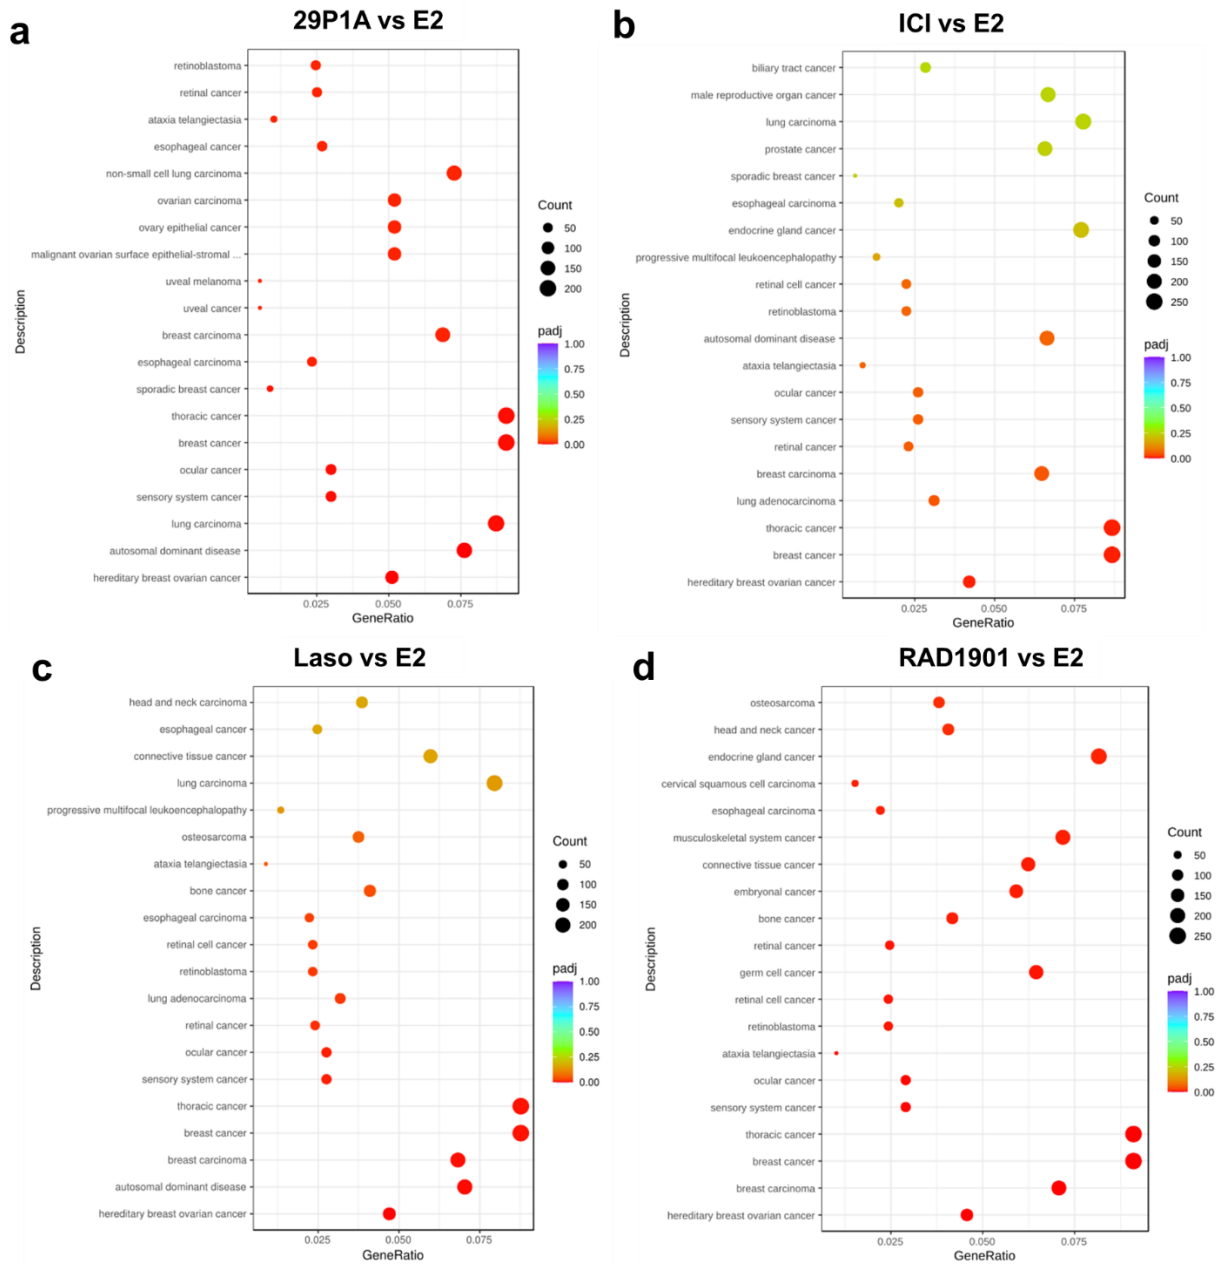

**Supplementary Figure 9:** Disease ontology (DO) enrichment analysis for T47D cells in the presence of 1 nM E2 and treated with A) T6I-29P1A, B) ICI, C) Laso, and D) RAD1901. DO terms with corrected *P*-value less than 0.05 were included as significantly enriched by differential expressed genes compared to E2 only treated cells.

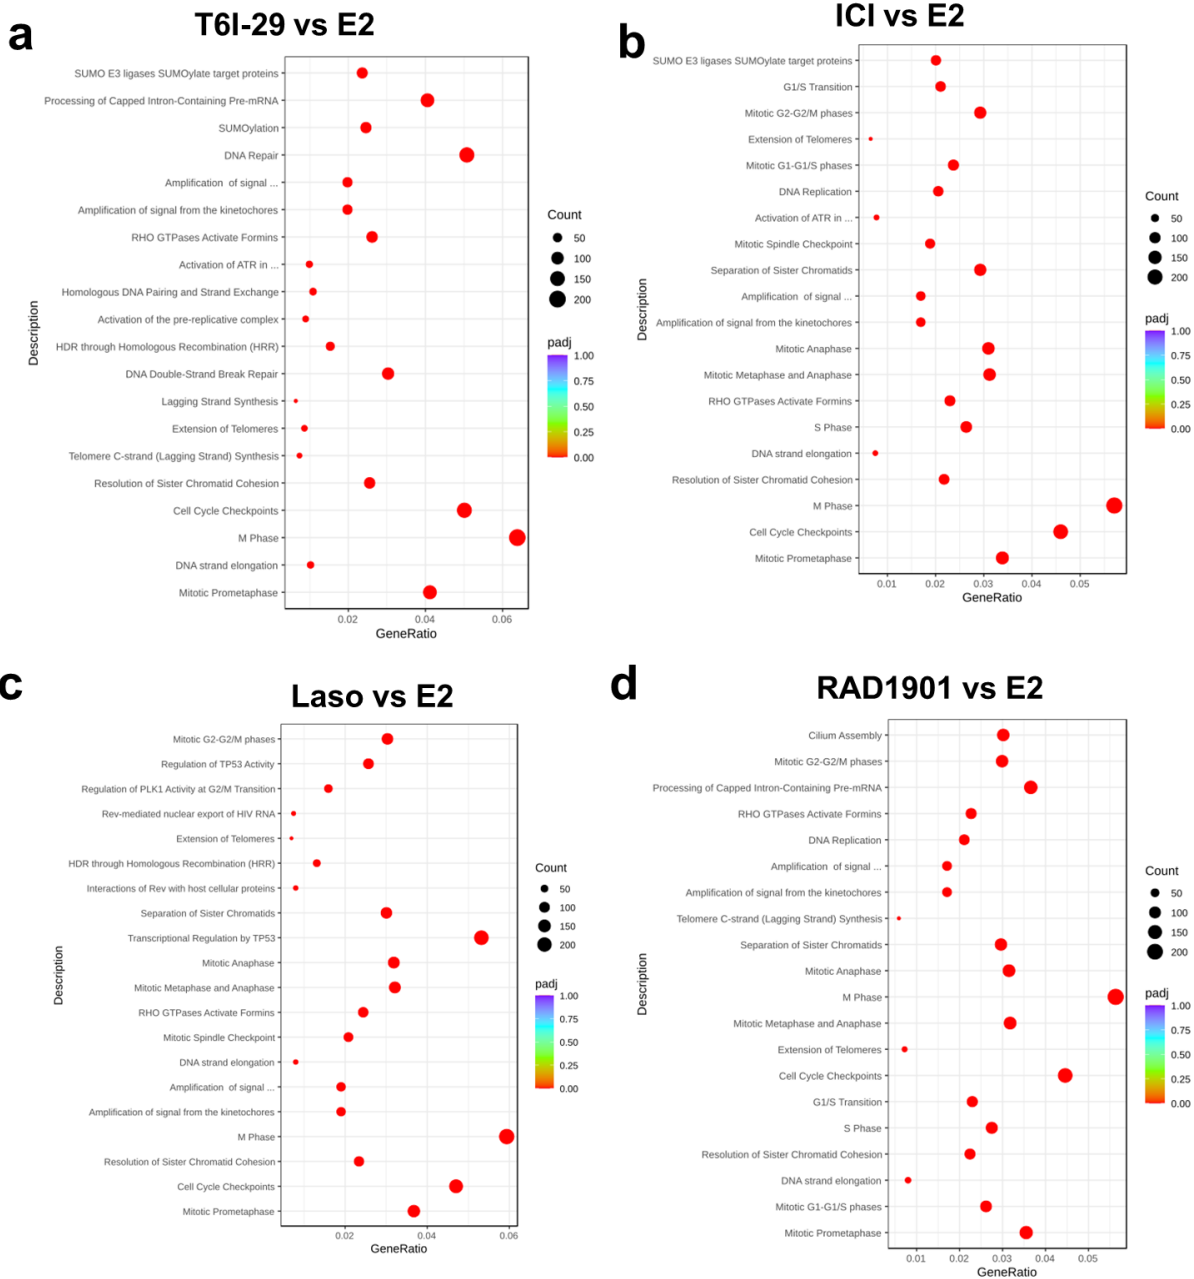

**Supplementary Figure 10:** Reactome pathway analysis for T47D cells in the presence of 1 nM E2 and treated with A) T6I-29P1A, B) ICI, C) Laso, and D) RAD1901. GO terms with corrected *P*-value less than 0.05 were included as significantly enriched by differential expressed genes compared to E2 only treated cells.

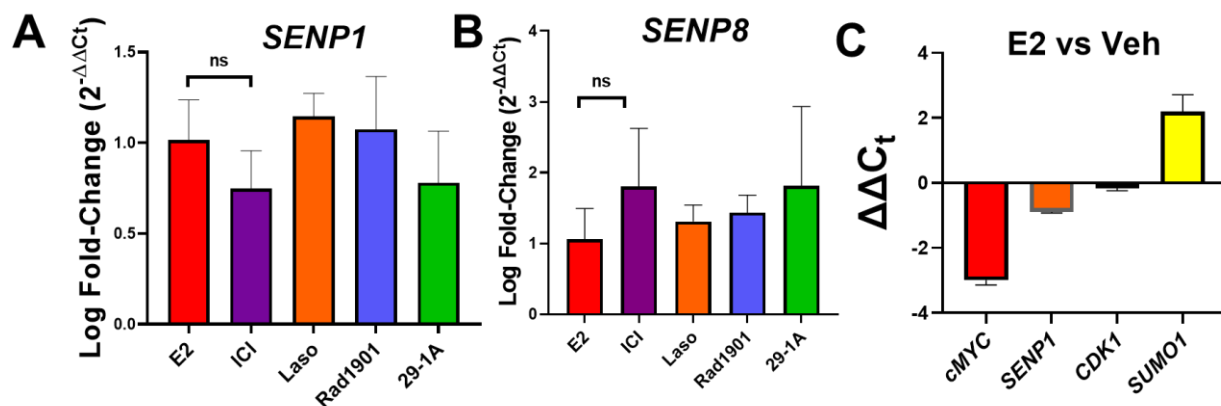

**Supplementary Figure 11:** Induction of SUMO-related genes in T47D breast cancer cells. A) Effect of 1  $\mu$ M antagonist treatment on *SENP1* expression in the presence of 1 nM E2, normalized to 1 nM E2 alone. B) Effect of 1  $\mu$ M antagonist treatment on *SENP8* expression in the presence of 1 nM E2, normalized to 1 nM E2 alone. C) Change in *cMYC*, *SENP1*, *CDK1*, *SUMO1* gene expression in T47D breast cancer cells treated with 1 nM E2 compared to vehicle (veh).  $\Delta\Delta C_t = \Delta C_t(\text{E2}) - \Delta C_t(\text{veh})$ . Data are the mean of three replicates  $\pm$  std. dev. and significance was determined by unpaired t-test.

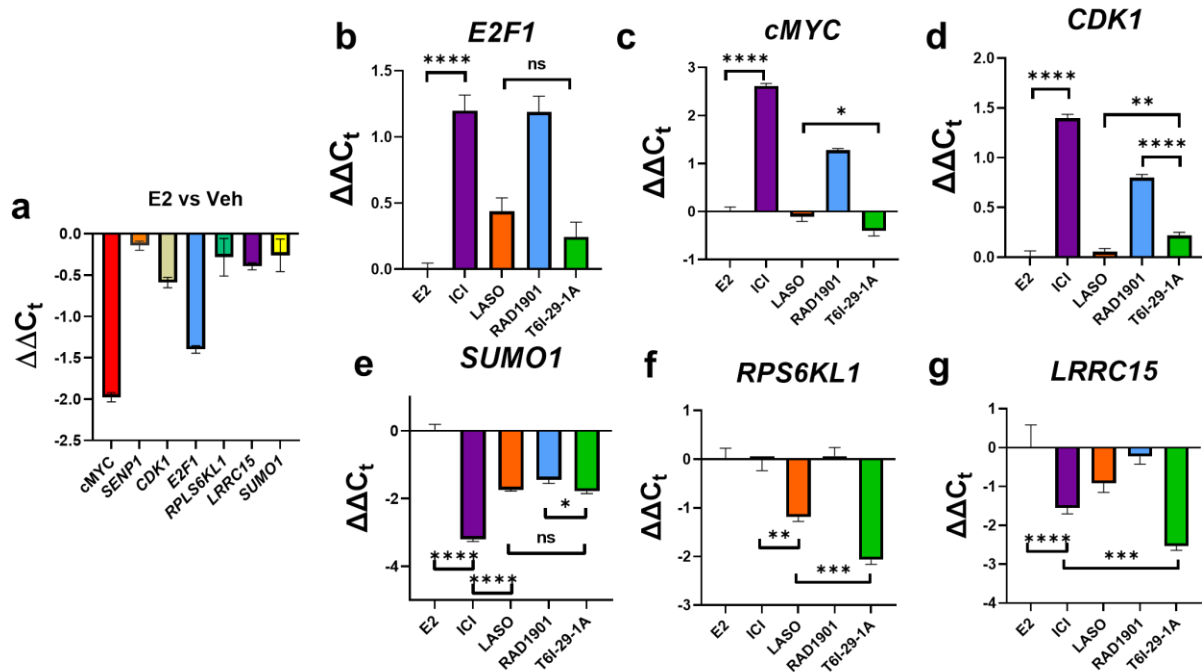

**Supplementary Figure 12:** Induction of ER $\alpha$  target gene expression in MCF7 WS:8 breast cancer cells.  $\Delta\Delta C_t = \Delta C_t(E2) - \Delta C_t(veh)$  (A). The effect of T6I-29-1A on the transcription E2F1 (B), cMYC (C), CDK1 (D), SUMO1 (E), RPSKL1 (F), and LRRC15 (G) in MCF7 WS:8 cells. Significance was determined by unpaired t-test where \*  $p < 0.05$ , \*\*  $p < 0.005$ , \*\*\*  $p < 0.0005$ , \*\*\*\*  $p < 0.00005$ , ns = not significant.

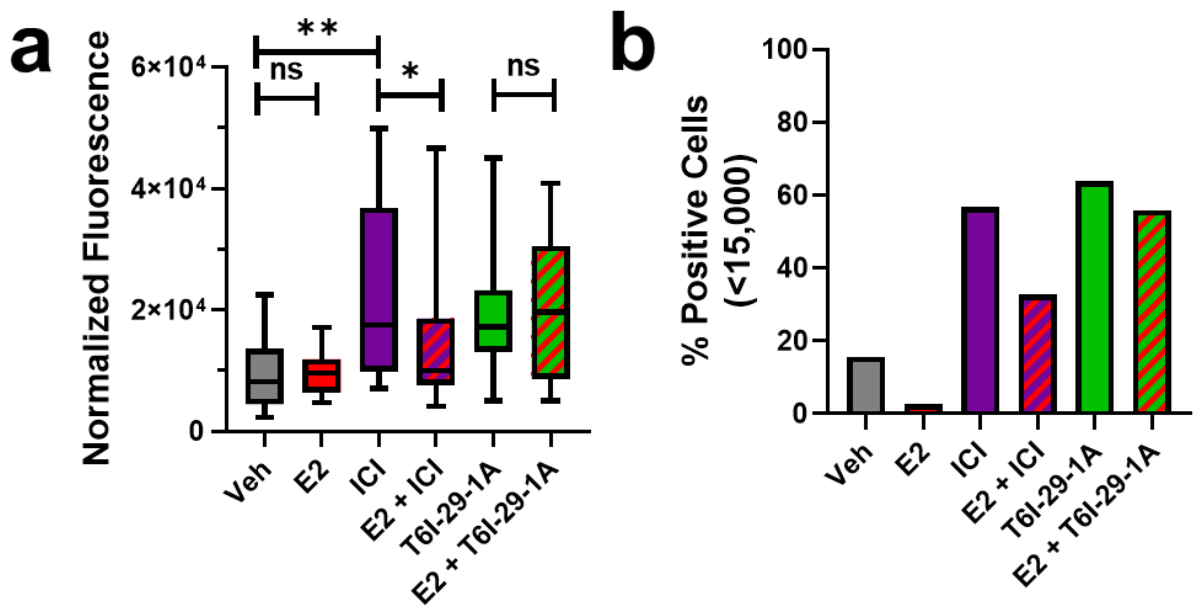

**Supplementary Figure 13:** Quantification of nuclear SUMO1 immunofluorescence (IF) in T47D breast cancer cells. A) Green fluorescence (SUMO signal) per cell. Significance determined by unpaired t-test where ns = not significant, \*  $p < 0.05$ , \*\*  $p < 0.005$ . B) Percent positive cells (those above a threshold of 15,000 relative fluorescence units) in each treatment condition.

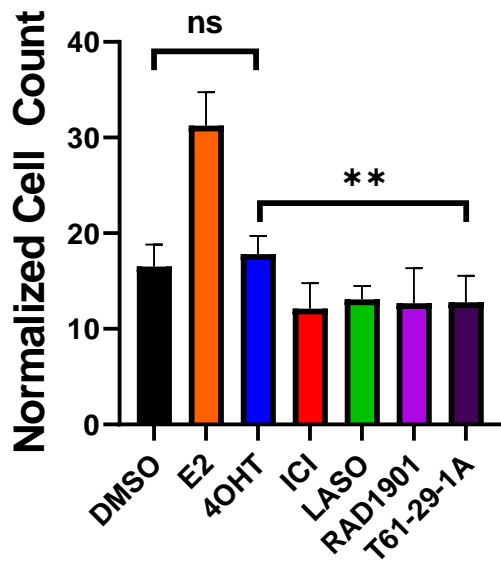

**Supplementary Figure 14:** Effect of E2 and antiestrogens on Ishikawa proliferation after 72 hours treatment. Cell count is normalized to starting cell count per well. Data are the mean of 2 independent replicates (6 technical replicates total)  $\pm$  std. dev., ns = not significant, \*\*  $p < 0.005$  as determined by unpaired t-test.

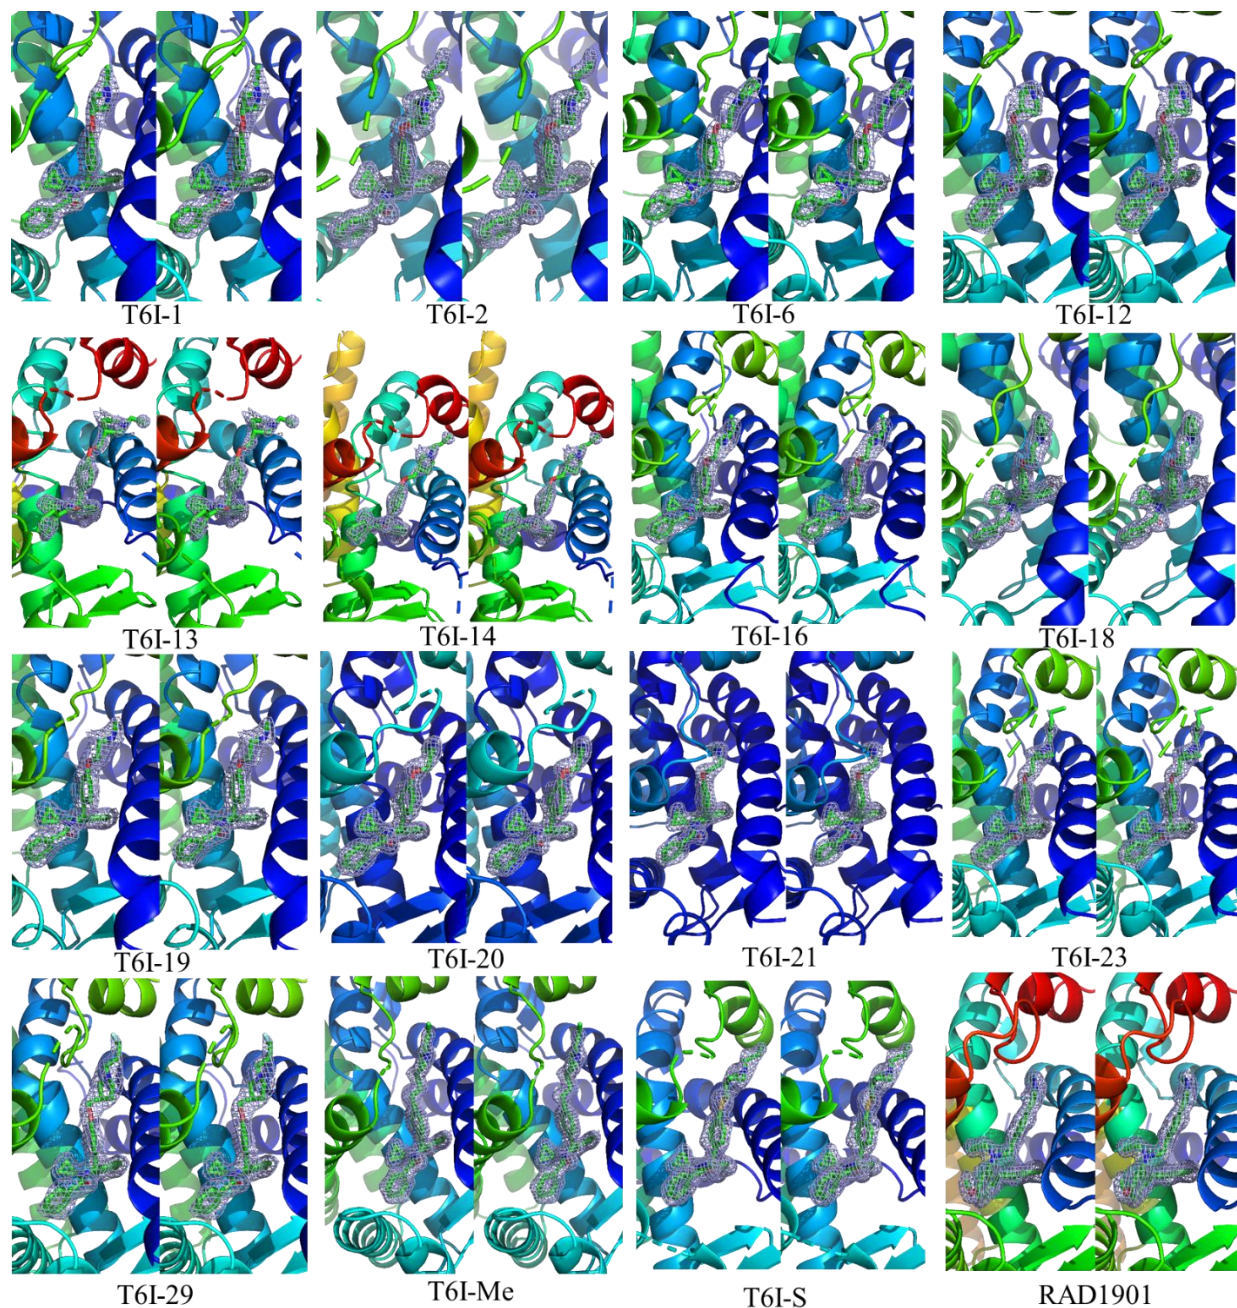

**Supplementary Figure 15:** Stereo images of difference density maps (2mFo-DFc) of each ligand in the hormone binding pocket for every x-ray co-crystal structure, maps are shown at 1.5  $\sigma$ .

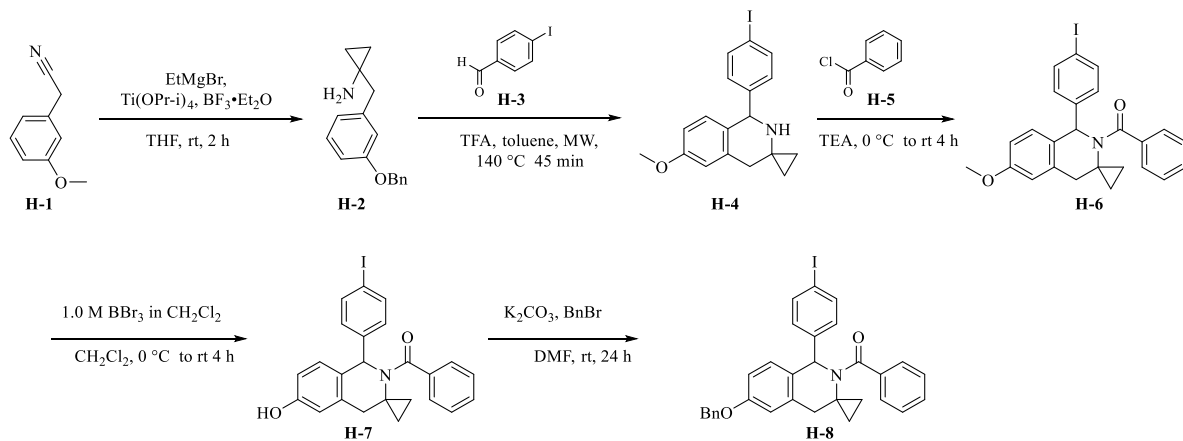

**Supplementary Figure 16: Synthetic scheme for intermediate H-8.**

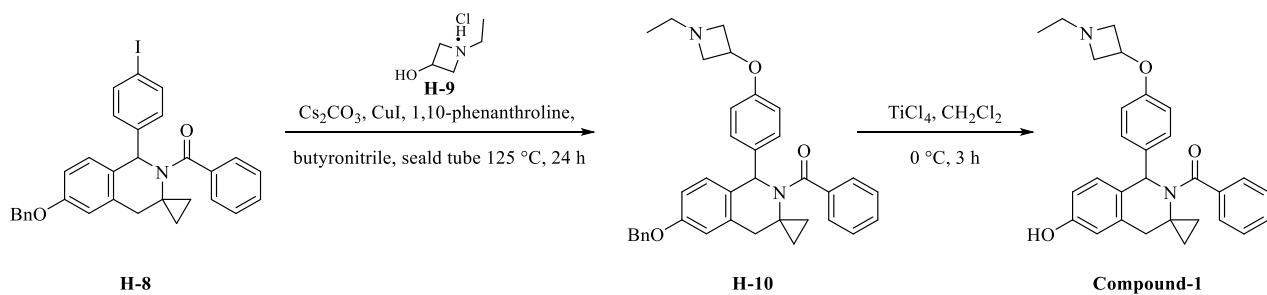

**Supplementary Figure 17: Synthetic scheme for compound-1 (T6I-1).**

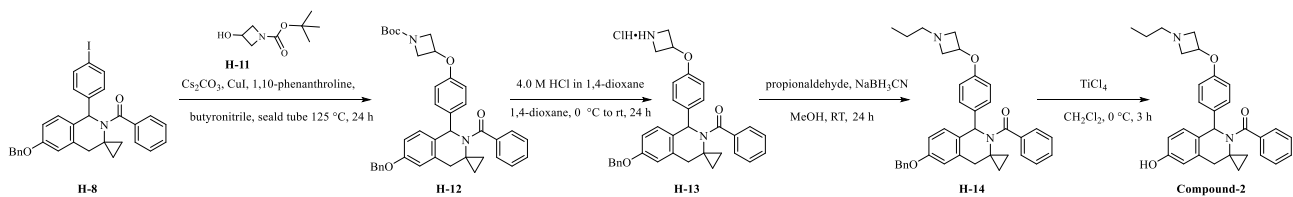

**Supplementary Figure 18: Synthetic scheme for compound-2 (T6I-2).**

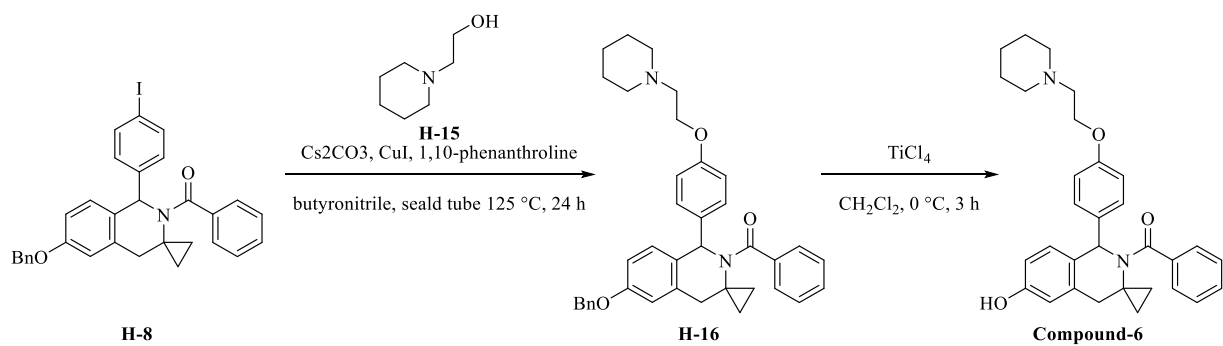

**Supplementary Figure 19:** Synthetic scheme for compound-6 (T6I-6).

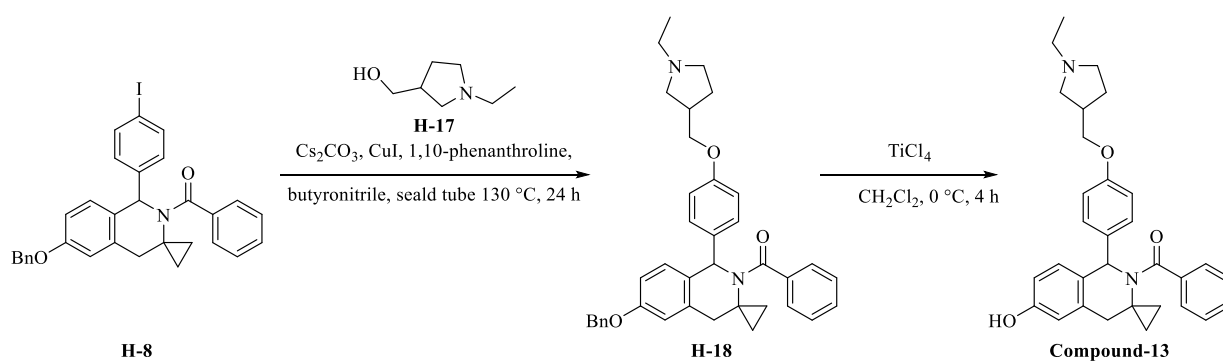

**Supplementary Figure 20:** Synthetic scheme for compound-13 (T6I-13).

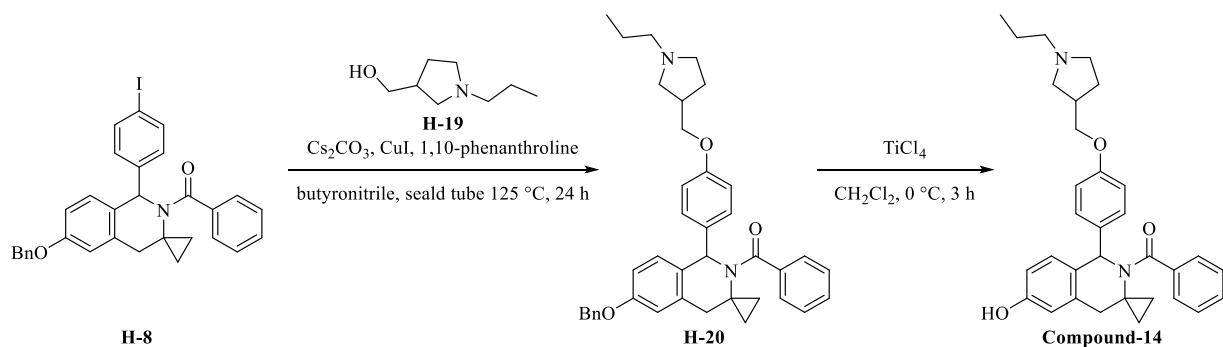

**Supplementary Figure 21:** Synthetic scheme for compound-14 (T6I-14).

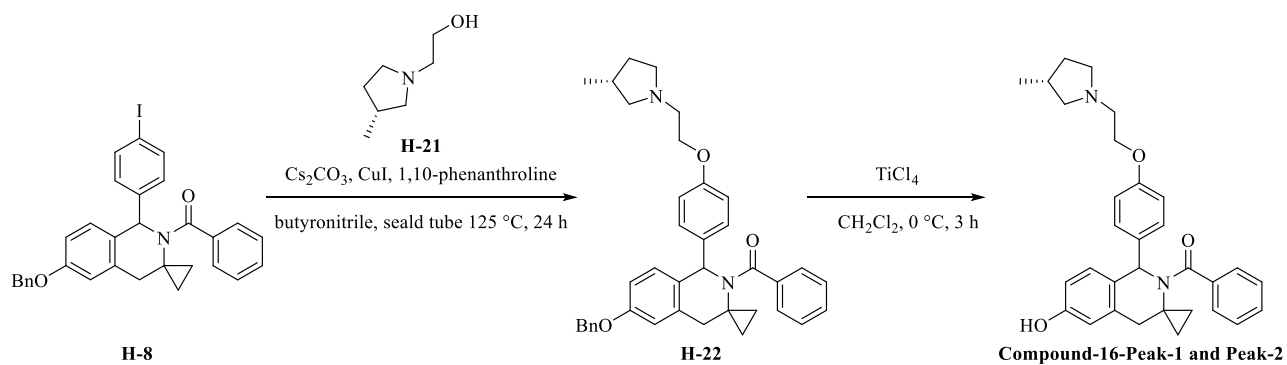

**Supplementary Figure 22: Synthetic scheme for compound-16 (T6I-16).**

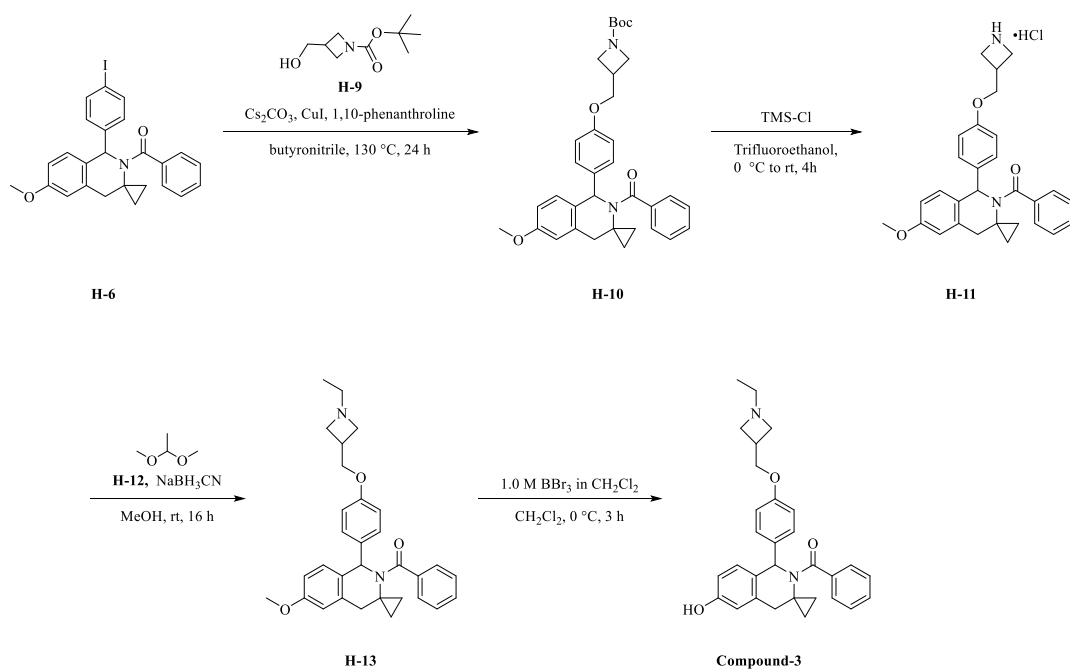

**Supplementary Figure 23: Synthetic scheme for compound-3 (T6I-3).**

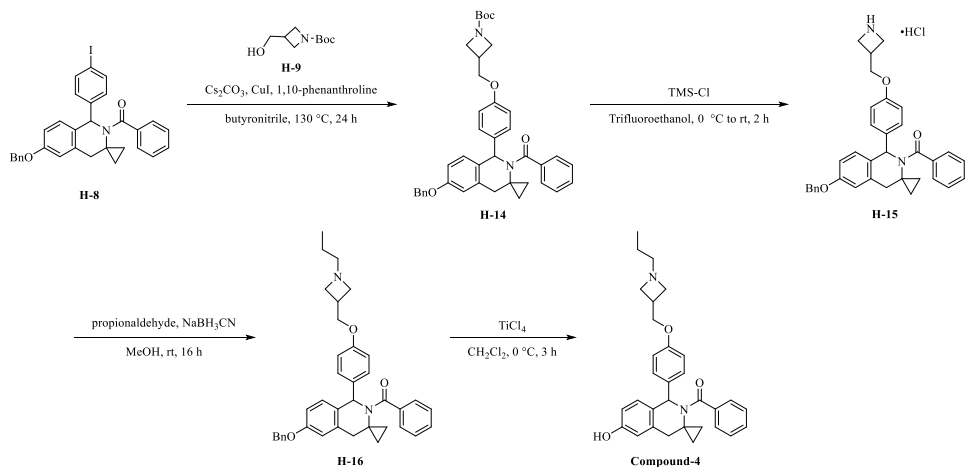

**Supplementary Figure 24:** Synthetic scheme for compound-4 (T6I-4).

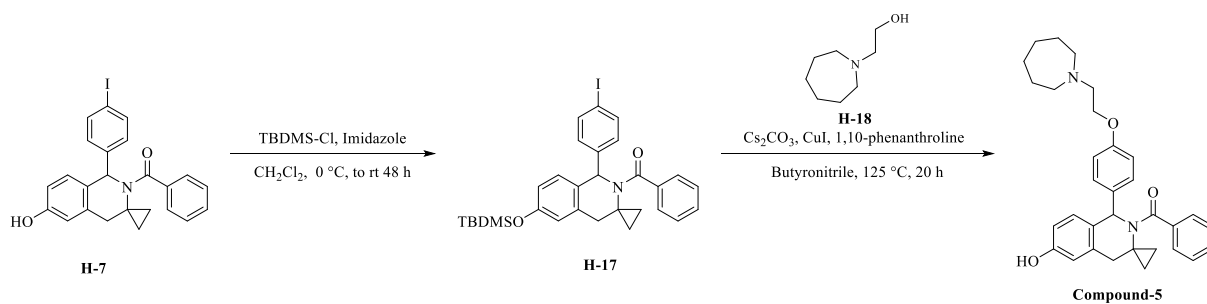

**Supplementary Figure 25:** Synthetic scheme for compound-5 (T6I-5).

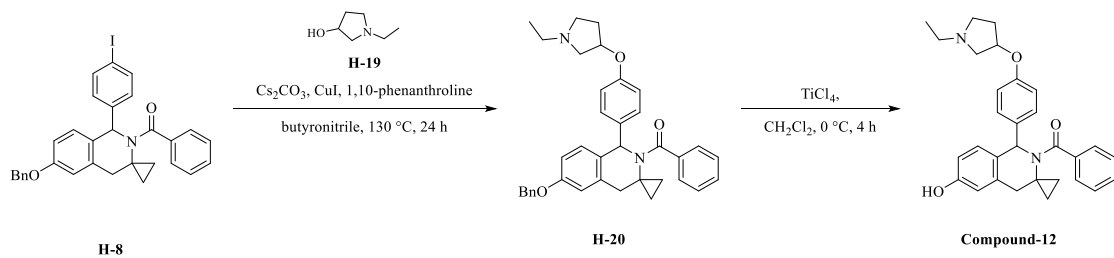

**Supplementary Figure 26:** Synthetic scheme for compound-12 (T6I-12).

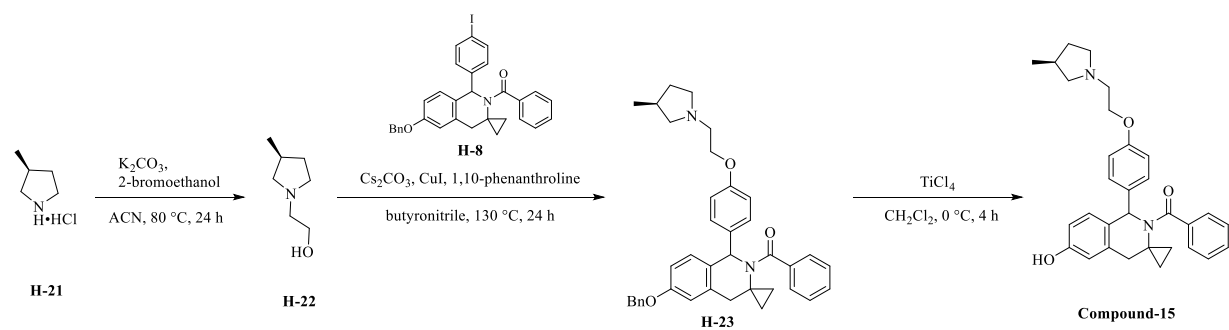

**Supplementary Figure 27:** Synthetic scheme for compound-15 (T6I-15).

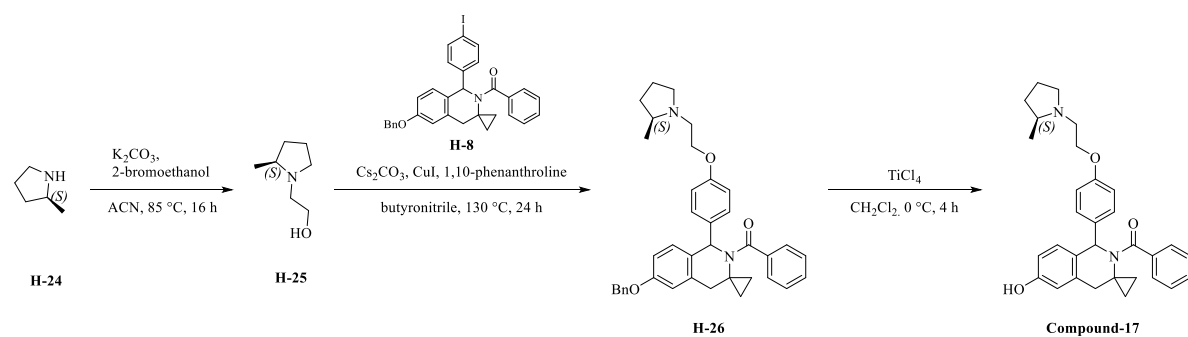

**Supplementary Figure 28:** Synthetic scheme for compound-17 (T6I-17).

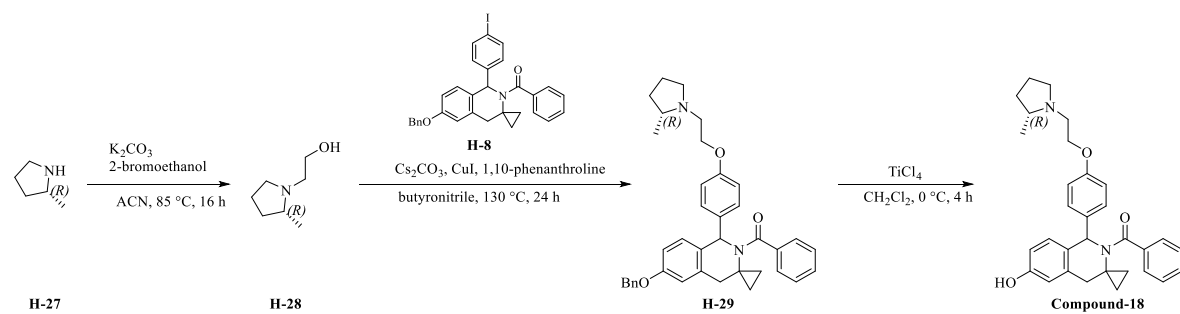

**Supplementary Figure 29:** Synthetic scheme for compound-18 (T6I-18).

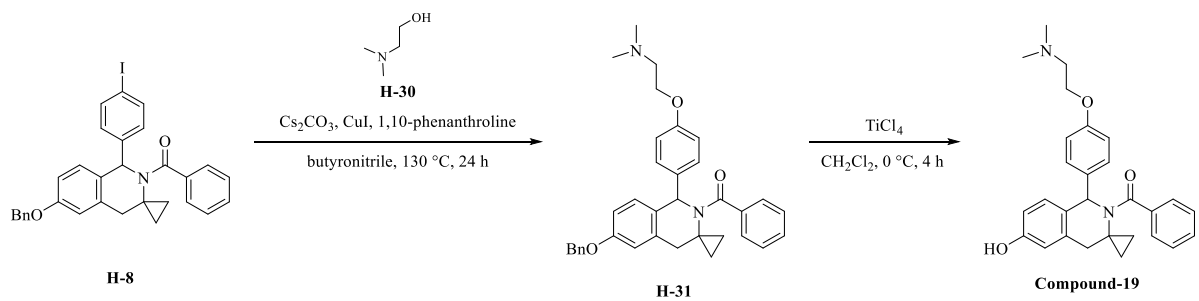

**Supplementary Figure 30:** Synthetic scheme for compound-19 (T6I-19).

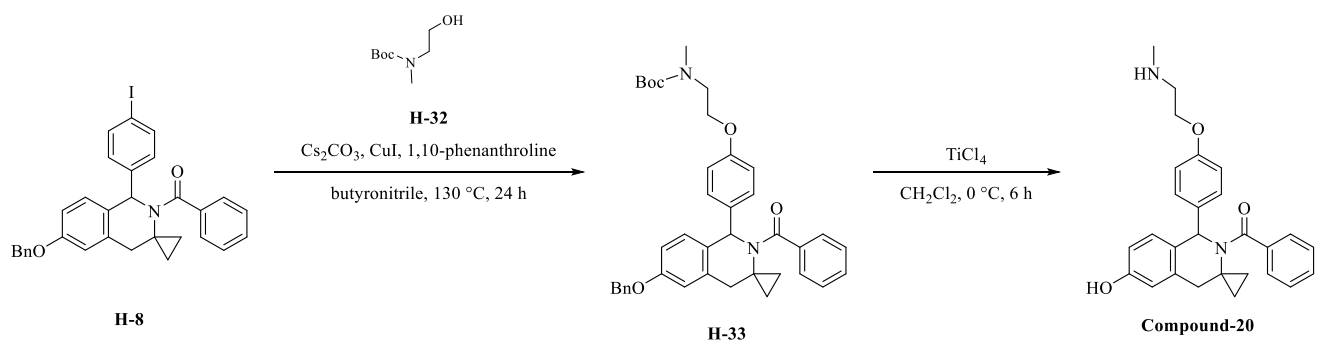

**Supplementary Figure 31:** Synthetic scheme for compound-20 (T6I-20).

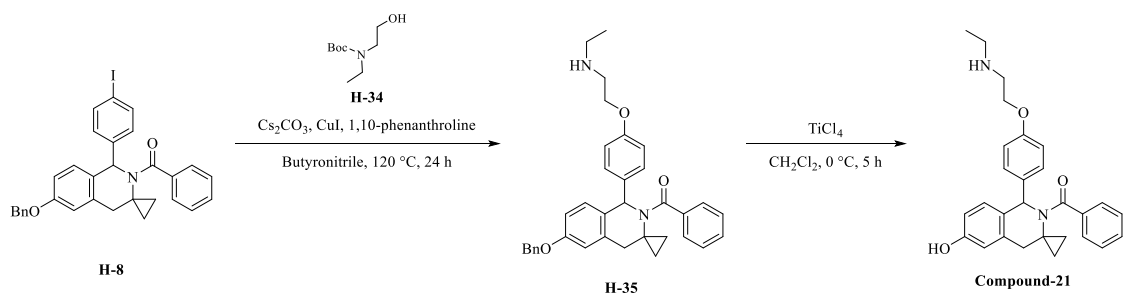

**Supplementary Figure 32:** Synthetic scheme for compound-21 (T6I-21).

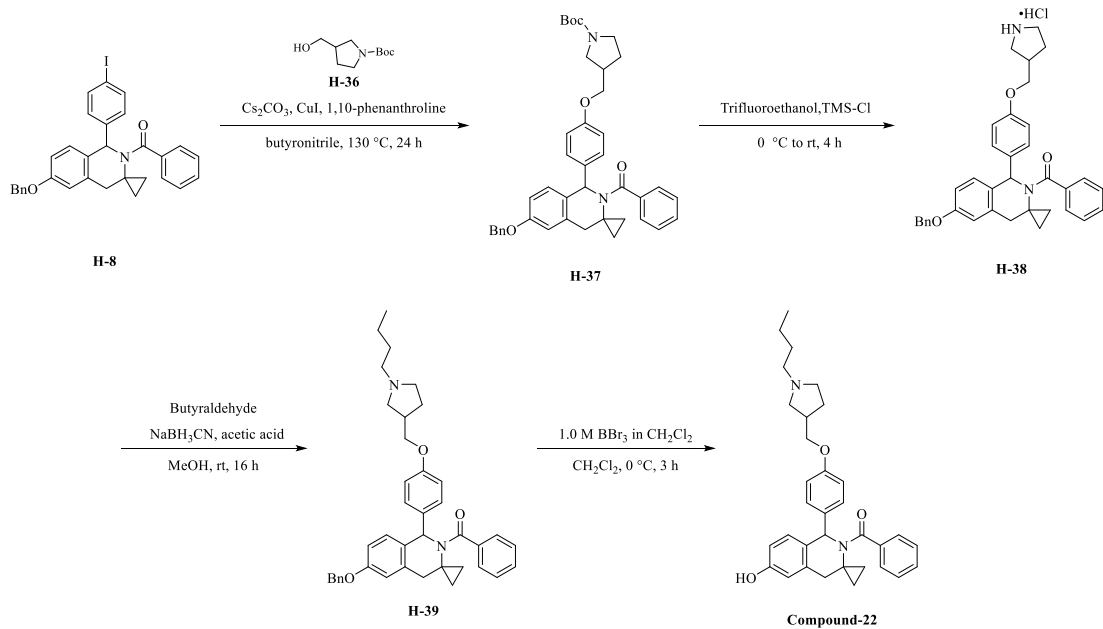

**Supplementary Figure 33: Synthetic scheme for compound-22 (T6I-22).**

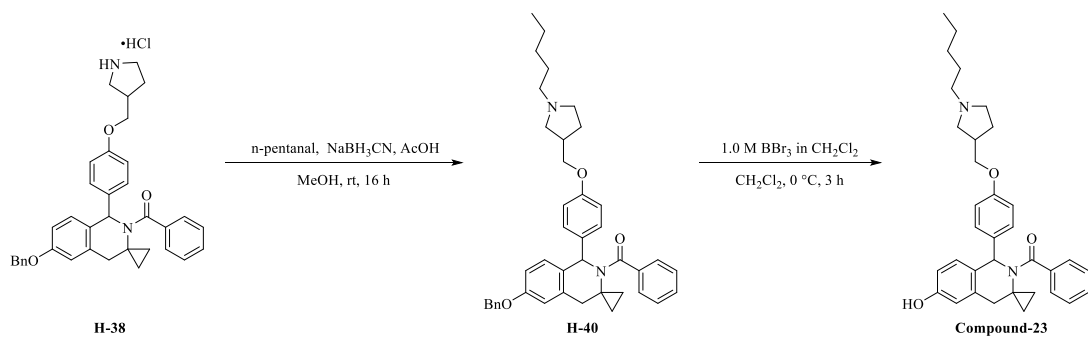

**Supplementary Figure 34: Synthetic scheme for compound-23 (T6I-23).**

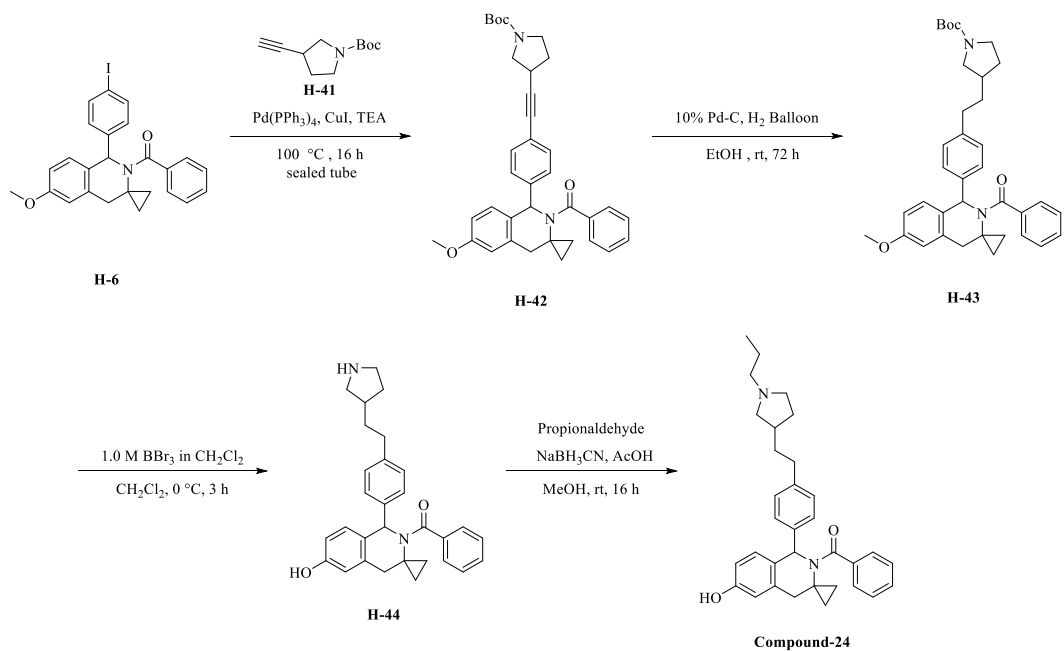

**Supplementary Figure 35:** Synthetic scheme for compound-24 (T6I-Me).

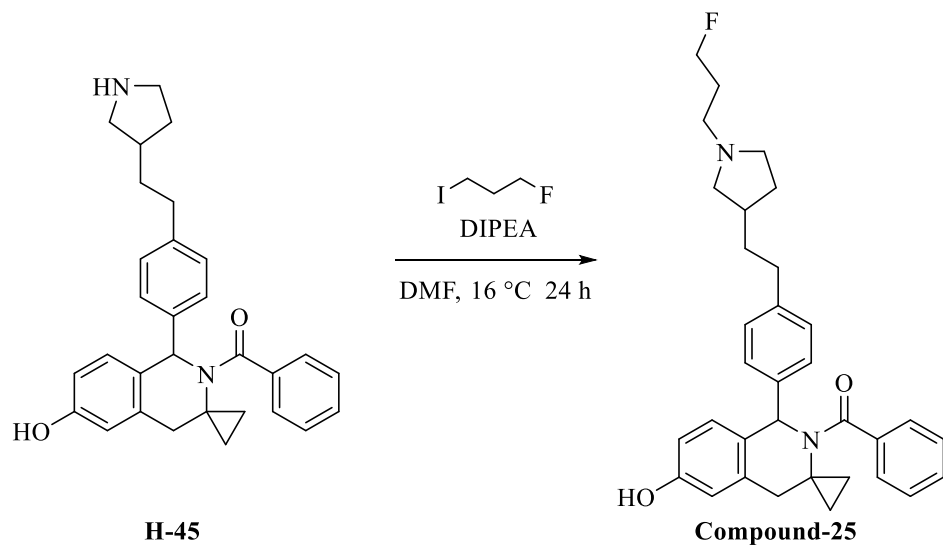

**Supplementary Figure 36:** Synthetic scheme for compound-25 (T6I-25).

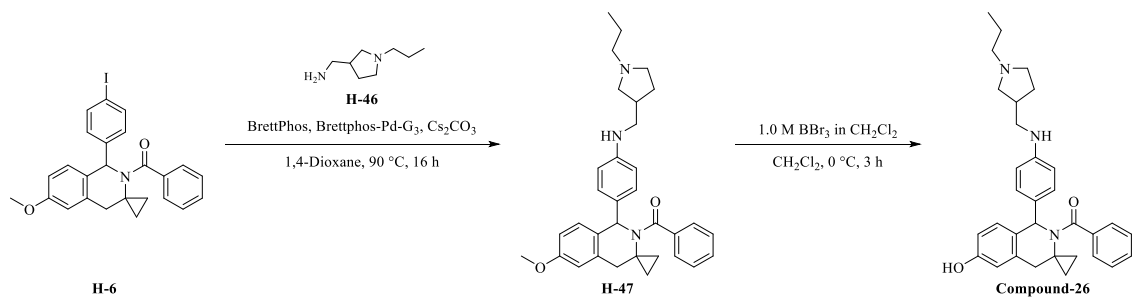

**Supplementary Figure 37: Synthetic scheme for compound-26 (T6I-NH).**

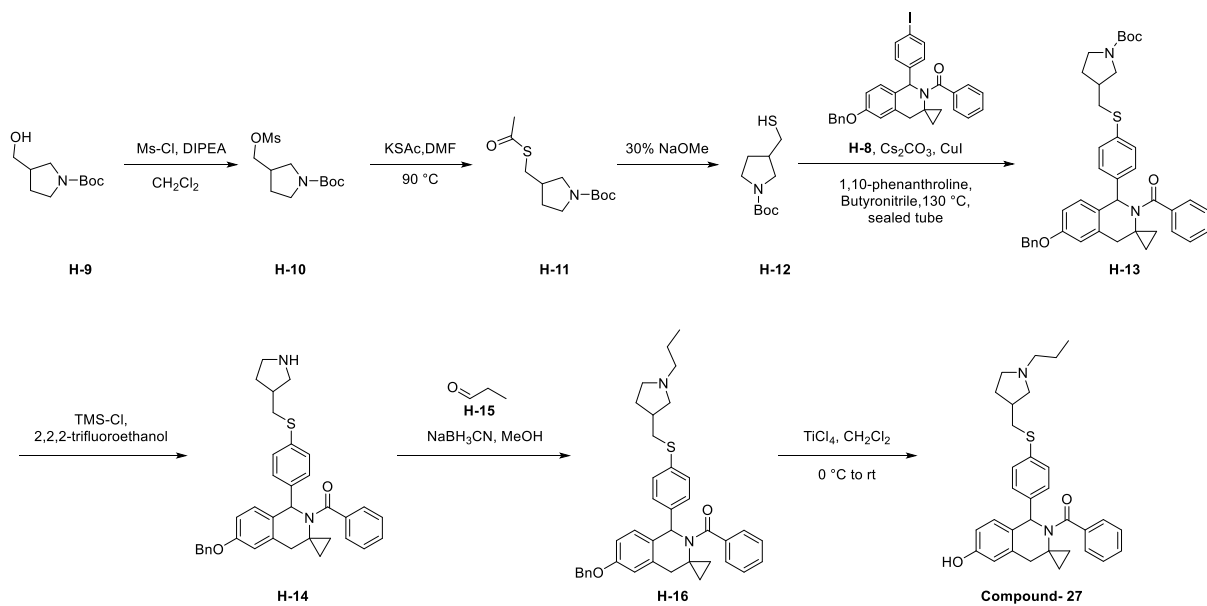

**Supplementary Figure 38: Synthetic scheme for compound-27 (T6I-27).**

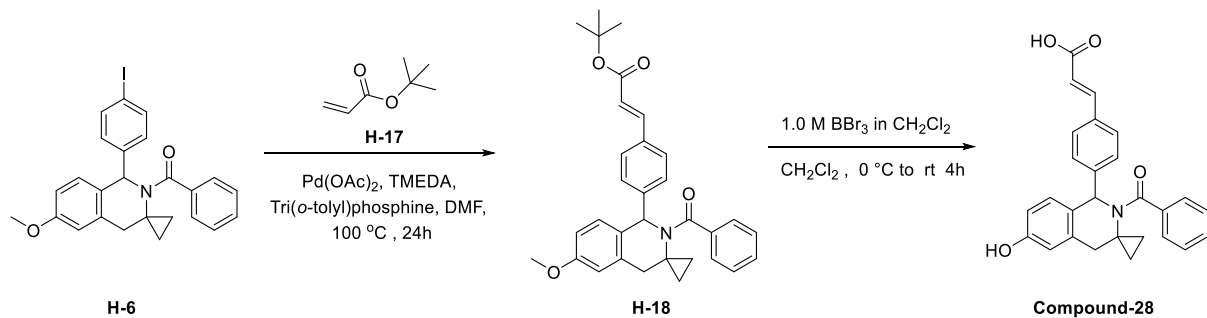

**Supplementary Figure 39: Synthetic scheme for compound-28 (T6I-28).**

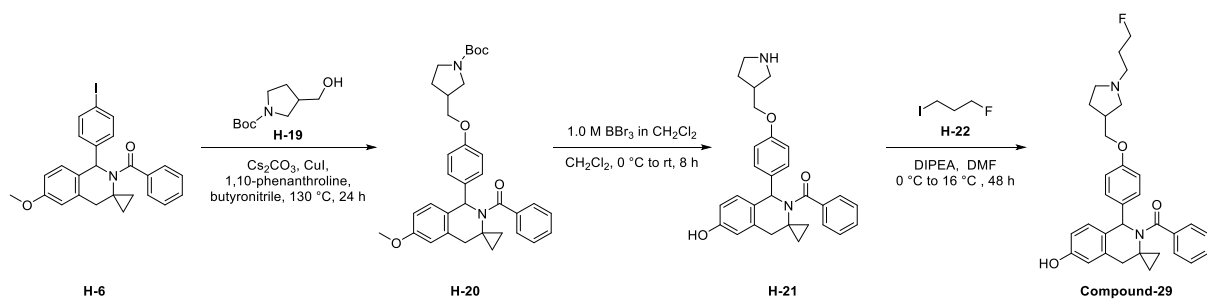

**Supplementary Figure 40:** Synthetic scheme for compound-29 (T6I-29).

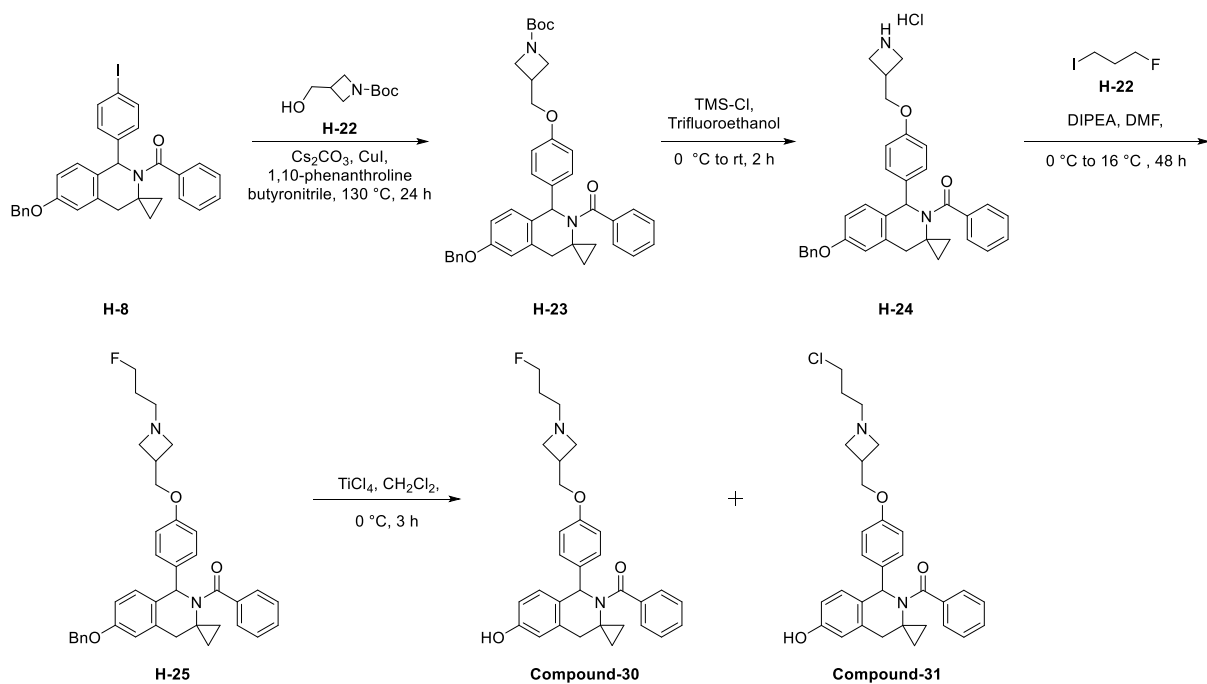

**Supplementary Figure 41:** Synthetic scheme for compounds-30 and 31 (T6I-4A and 4B).



## SUPPLEMENTARY TABLES

**Supplementary Table 1:** Mean + std. dev. for AP1 assay ( $n = 3-9$ ).

| <b>Treatment</b> | <b>AP1 Induction</b> |
|------------------|----------------------|
| E2               | $0.99 \pm 0.05$      |
| 4OHT             | $0.67 \pm 0.12$      |
| ICI              | $0.25 \pm 0.08$      |
| Laso             | $0.51 \pm 0.16$      |
| RAD1901          | $0.28 \pm 0.08$      |
| T6I-1            | $0.30 \pm 0.07$      |
| T6I-2            | $0.25 \pm 0.08$      |
| T6I-3            | $0.34 \pm 0.07$      |
| T6I-4            | $0.24 \pm 0.07$      |
| T6I-4A           | $0.69 \pm 0.16$      |
| T6I-4B           | $0.61 \pm 0.10$      |
| T6I-5            | $0.57 \pm 0.14$      |
| T6I-6            | $0.43 \pm 0.14$      |
| T6I-12           | $0.41 \pm 0.08$      |

|           |                 |
|-----------|-----------------|
| T6I-13-1  | $0.66 \pm 0.17$ |
| T6I-14-1  | $0.55 \pm 0.09$ |
| T6I-15-1  | $0.55 \pm 0.12$ |
| T6I-16-1  | $0.35 \pm 0.09$ |
| T6I-17    | $0.71 \pm 0.20$ |
| T6I-18    | $0.69 \pm 0.10$ |
| T6I-19    | $0.36 \pm 0.03$ |
| T6I-20    | $0.30 \pm 0.05$ |
| T6I-21    | $0.46 \pm 0.04$ |
| T6I-22    | $0.55 \pm 0.06$ |
| T6I-23    | $0.44 \pm 0.08$ |
| T6I-Me    | $0.57 \pm 0.08$ |
| T6I-NH    | $0.50 \pm 0.09$ |
| T6I-SH    | $0.42 \pm 0.07$ |
| T6I-29    | $0.63 \pm 0.08$ |
| T6I-29-1A | $0.54 \pm 0.07$ |
| T6I-29-1B | $0.32 \pm 0.05$ |

|           |                 |
|-----------|-----------------|
| T6I-29-2A | $0.33 \pm 0.05$ |
| T6I-29-2B | $0.56 \pm 0.09$ |

**Supplementary Table 2:** X-ray Crystal Structure Data Collection and Refinement for Ligands in Complex with ER $\alpha$  LBD (Highest Resolution Shell).

|                             | <b>T6I-1</b>         | <b>T6I-2</b>         | <b>T6I-6</b>         | <b>T6I-12</b>        |
|-----------------------------|----------------------|----------------------|----------------------|----------------------|
| PDB ID                      | 8DU6                 | 8DU8                 | 8DU9                 | 8DUB                 |
| Data Collection             |                      |                      |                      |                      |
| Space Group                 | C2                   | C2                   | C2                   | C2                   |
| Cell dimensions             |                      |                      |                      |                      |
| a, b, c (Å)                 | 102.28, 58.37, 87.66 | 102.66, 57.67, 87.43 | 102.25, 58.08, 87.57 | 102.52, 57.89, 87.72 |
| $\alpha, \beta, \gamma$ (°) | 90.00, 103.12, 90.00 | 90.00, 103.20, 90.00 | 90.00, 103.00, 90.00 | 90.00, 103.09, 90.00 |
| Resolution (Å)              | 2.10                 | 1.47                 | 2.50                 | 1.84                 |
| $CC^{1/2}$                  | 0.985 (0.558)        | 0.998 (0.92)         | 0.980 (0.589)        | 0.984 (0.606)        |
| $I/\sigma I$                | 2.44 (at 2.10 Å)     | 2.40 (at 1.47 Å)     | 5.81 (at 2.51 Å)     | 1.83 (at 1.84 Å)     |
| Completeness                | 95.6 (86.5)          | 98.3 (88.0)          | 99.9 (100)           | 99.8 (100)           |
| Redundancy                  | 3.3                  | 3.7                  | 3.6                  | 3.7                  |
| Refinement                  |                      |                      |                      |                      |
| Resolution Range (Å)        | 49.97 – 2.1          | 29.13 – 1.47         | 49.81 – 2.50         | 45.52 – 1.84         |
| Number of Reflections       | 28,464               | 83,028               | 17,470               | 43,269               |
| $R_{work}/R_{free}$         | 18.9/23.9            | 16.9/19.4            | 21.0/25.8            | 17.5/22.1            |
| No. Atoms                   | 3,875                | 4,306                | 3,577                | 3,926                |
| Water Molecules             | 199                  | 541                  | 81                   | 316                  |
| Ligand Molecules            | 2                    | 2                    | 2                    | 2                    |
| R.m.s. deviations           |                      |                      |                      |                      |
| Bond Lengths (Å)            | 0.003                | 0.018                | 0.004                | 0.018                |
| Bond Angles (°)             | 0.61                 | 0.74                 | 0.73                 | 1.662                |

|                             | <b>T6I-13</b>        | <b>T6I-14-1</b>      | <b>T6I-16-1</b>      | <b>T6I-18</b>        |
|-----------------------------|----------------------|----------------------|----------------------|----------------------|
| PDB ID                      | 8DUC                 | 8DUD                 | 8DUG                 | 8DUH                 |
| Data Collection             |                      |                      |                      |                      |
| Space Group                 | P6522                | P6522                | C2                   | C2                   |
| Cell dimensions             |                      |                      |                      |                      |
| a, b, c (Å)                 | 58.60, 58.60, 276.75 | 58.77, 58.77, 276.78 | 103.13, 57.22, 87.69 | 102.72, 57.28, 87.52 |
| $\alpha, \beta, \gamma$ (°) | 90.00, 90.00, 120.00 | 90.00, 90.00, 120.00 | 90.00, 103.89, 90.00 | 90.00, 103.49, 90.00 |
| Resolution (Å)              | 1.70                 | 1.81                 | 2.20                 | 1.90                 |
| $CC^{1/2}$                  | 0.99 (0.58)          | 0.99 (0.52)          | 0.998 (0.58)         | 0.991 (0.502)        |
| $I/\sigma I$                | 1.68 (at 1.70 Å)     | 1.95 (at 1.81 Å)     | 1.70 (at 2.20 Å)     | 0.97 (at 1.89 Å)     |
| Completeness                | 99.9 (98.2)          | 99.1 (84.6)          | 99.7 (96.5)          | 97.4 (82.7)          |
| Redundancy                  | 18.9                 | 14.9                 | 3.6                  | 3.6                  |
| Refinement                  |                      |                      |                      |                      |

|                                      |              |              |              |              |
|--------------------------------------|--------------|--------------|--------------|--------------|
| Resolution Range (Å)                 | 47.65 – 1.70 | 47.77 – 1.81 | 45.32 – 2.20 | 45.26 – 1.90 |
| R <sub>work</sub> /R <sub>free</sub> | 22.2/26.2    | 21.2/25.5    | 19.1/25.0    | 18.6/23.5    |
| Number of Reflections                | 32,444       | 25,250       | 25,439       | 37,736       |
| No. Atoms                            | 2,029        | 1,998        | 3,655        | 3,888        |
| Water Molecules                      | 239          | 179          | 141          | 289          |
| Ligand Molecules                     | 1            | 1            | 2            | 2            |
| Bond Lengths (Å)                     | 0.01         | 0.01         | 0.04         | 0.009        |
| Bond Angles (°)                      | 1.32         | 1.24         | 0.61         | 1.12         |

|                                      | <b>T6I-19</b>        | <b>T6I-20</b>         | <b>T6I-21</b>         | <b>T6I-23</b>        |
|--------------------------------------|----------------------|-----------------------|-----------------------|----------------------|
| PDB ID                               | 8DUI                 | 8DUK                  | 8DUS                  | 8DV5                 |
| Data Collection                      |                      |                       |                       |                      |
| Space Group                          | C2                   | C2                    | C2                    | C2                   |
| Cell dimensions                      |                      |                       |                       |                      |
| a, b, c (Å)                          | 102.97, 57.49, 87.57 | 102.03, 57.66, 174.52 | 102.04, 57.67, 259.87 | 101.93, 57.34, 87.14 |
| α, β, γ (°)                          | 90.00, 103.77, 90.00 | 90.00, 102.51, 90.00  | 90.00, 100.08, 90.00  | 90.00, 103.09, 90.00 |
| CC <sup>1/2</sup>                    | 0.998 (0.521)        | 0.998 (0.624)         | 0.993 (0.516)         | 0.999 (0.547)        |
| I/σI                                 | 2.35 (at 2.04 Å)     | 1.72 (at 1.70 Å)      | 1.59 (at 1.90 Å)      | 1.89 (at 1.86 Å)     |
| Completeness                         | 0.998 (0.95)         | 0.994 (0.942)         | 0.988 (0.872)         | 0.998 (0.982)        |
| Redundancy                           | 3.7                  | 3.4                   | 3.0                   | 3.7                  |
| Refinement                           |                      |                       |                       |                      |
| Resolution Range (Å)                 | 45.42 – 2.04         | 49.91 – 1.7           | 49.91 – 1.90          | 45.15 – 1.85         |
| Number of Reflections                | 38,034               | 106,232               | 102,498               | 41,967               |
| R <sub>work</sub> /R <sub>free</sub> | 18.8/22.6            | 23.8 /26.8            | 28.5/32.7             | 18.4/21.3            |
| No. Atoms                            | 3,757                | 8,138                 | 11,368                | 3,986                |
| Water Molecules                      | 199                  | 656                   | 489                   | 301                  |
| Ligand Molecules                     | 2                    | 4                     | 6                     | 2                    |
| Bond Lengths (Å)                     | 0.04                 | 0.01                  | 0.01                  | 0.06                 |
| Bond Angles (°)                      | 0.92                 | 1.22                  | 1.31                  | 1.017                |

|                 | <b>T6I-Me</b>        | <b>T6I-S</b>         | <b>T6I-29</b>        | <b>RAD1901</b>         |
|-----------------|----------------------|----------------------|----------------------|------------------------|
| PDB ID          | 8DV7                 | 8DV8                 | 8DVB                 | 7TE7                   |
| Data Collection |                      |                      |                      |                        |
| Space Group     | C2                   | C2                   | C2                   | C2                     |
| Cell dimensions |                      |                      |                      |                        |
| a, b, c (Å)     | 102.29, 57.78, 87.41 | 103.11, 58.13, 87.64 | 103.10, 56.34, 87.35 | 58.183, 58.183, 277.24 |
| α, β, γ (°)     | 90.00, 103.10, 90.00 | 90.00, 102.79, 90.00 | 90.00, 103.25, 90.00 | 90.00, 90.00, 120.00   |

|                                      |                  |                  |                  |                  |
|--------------------------------------|------------------|------------------|------------------|------------------|
| Resolution                           | 1.59             | 1.70             | 2.19             | 1.85             |
| CC <sup>1/2</sup>                    | 0.997 (0.524)    | 0.999 (0.876)    | 0.999 (0.524)    | 0.998 (0.510)    |
| <i>I</i> / $\sigma$ <i>I</i>         | 1.93 (at 1.97 Å) | 1.76 (at 1.70 Å) | 1.23 (at 2.18 Å) | 7.26 (at 1.86 Å) |
| Completeness                         | 0.951 (0.70)     | 0.996 (0.975)    | 0.999 (0.96)     | 0.993 (0.87)     |
| Redundancy                           | 3.6              | 3.7              | 3.7              | 3.7              |
| Refinement                           |                  |                  |                  |                  |
| Resolution Range (Å)                 | 41.13 – 1.59     | 41.41 – 1.70     | 49.12 – 2.19     | 50 – 1.85        |
| Number of Reflections                | 63,596           | 54,985           | 19,241           | 27,286           |
| R <sub>work</sub> /R <sub>free</sub> | 16.7/20.8        | 18.7/21.1        | 19.2/24.2        | 21.9/24.6        |
| No. Atoms                            | 4,195            | 4,000            | 3,867            | 1,841            |
| Water Molecules                      | 442              | 466              | 137              | 250              |
| Ligand Molecules                     | 2                | 2                | 2                | 1                |
| Bond Lengths (Å)                     | 0.016            | 0.007            | 0.004            | 0.005            |
| Bond Angles (°)                      | 1.56             | 1.17             | 0.931            | 0.847            |

**Supplementary Table 3: HPLC Method Gradient.**

| <b>Time<br/>(min)</b> | <b>Flow<br/>(mL/min)</b> | <b>%A</b> | <b>%B</b> |
|-----------------------|--------------------------|-----------|-----------|
| 0                     | 1.0                      | 95.0      | 5.0       |
| 2                     | 1.0                      | 95.0      | 5.0       |
| 8                     | 1.0                      | 30.0      | 70.0      |
| 10                    | 1.0                      | 5.0       | 95.0      |
| 12                    | 1.0                      | 5.0       | 95.0      |
| 12.1                  | 1.0                      | 95.0      | 5.0       |
| 15                    | 1.0                      | 95.0      | 5.0       |

**Supplementary Table 4:** Prep HPLC Gradient.

| <b>Time<br/>(min)</b> | <b>Flow<br/>(mL/min)</b> | <b>%A</b> | <b>%B</b> |
|-----------------------|--------------------------|-----------|-----------|
| 0                     | 30.0                     | 90.0      | 10        |
| 1                     | 30.0                     | 90.0      | 10        |
| 10                    | 30.0                     | 50.0      | 50        |
| 15                    | 30.0                     | 20.0      | 80        |
| 15.5                  | 30.0                     | 5.0       | 95.0      |
| 17.5                  | 30.0                     | 5.0       | 95.0      |
| 18.0                  | 30.0                     | 90.0      | 10.0      |
| 20.0                  | 30.0                     | 90.0      | 10.0      |

**Supplementary Table 5:** Preparative SFC Method Conditions.

|                |                                              |
|----------------|----------------------------------------------|
| Column         | Chiralcel OX-H (250mmX21mm) 5 $\mu$          |
| Total Flow     | 85g-40%                                      |
| Mobile Phase A | 51g/min ( CO <sub>2</sub> )                  |
| Mobile Phase B | 34 mL/min (0.3% NH <sub>3</sub> in Methanol) |
| ABPR           | 100 bar                                      |
| Detection      | UV@220 nm                                    |
| Run time       | 20 min                                       |

|               |                  |
|---------------|------------------|
| Stocking time | 12 min           |
| Loading       | 10 mg/injection  |
| Dilution      | Methanol (100 %) |

**Supplementary Table 6:** Analytical SFC Method Conditions (Method-B):

|                |                                     |
|----------------|-------------------------------------|
| Column         | Chiralcel OX-H(150mmX4.6mm) 5 $\mu$ |
| Total Flow     | 4g-40%                              |
| Mobile Phase A | 2.4g/min ( CO <sub>2</sub> )        |
| Mobile Phase B | 1.6 mL/min (0.3% DEA in Methanol)   |
| ABPR           | 1500 psi                            |
| Column Temp    | 40 degree                           |
| Detection      | UV@220 nm                           |
| Run time       | 15 min                              |
| Dilution       | Methanol (100 %)                    |
